# Supplementary material
Source: publisher figshare collection journal article supplement (https://karger.figshare.com/articles/dataset/_/5122435)
Supplement: Supplementary file 1 [file 1]

**Supplementary Table 1.** Sampling variances ( $V$ ) of  $\hat{D}'$  and  $\hat{r}$  for different LD intensities ( $\pm W$ ,  $\pm M$  and  $\pm S$ ), combinations of allele frequencies ( $p$  and  $q$ ) at the loci, and sample sizes ( $N$ )<sup>a</sup>

| $p$ | $q$ | $N$ | $V(\hat{D}') / V(\hat{r})$ |                 |                 |                 |                 |                 |
|-----|-----|-----|----------------------------|-----------------|-----------------|-----------------|-----------------|-----------------|
|     |     |     | $-W$                       | $-M$            | $-S$            | $+W$            | $+M$            | $+S$            |
| 0.5 | 0.5 | 50  | 0.0276 / 0.0196            | 0.0206 / 0.0152 | 0.0088 / 0.0073 | 0.0270 / 0.0193 | 0.0209 / 0.0154 | 0.0086 / 0.0073 |
|     |     | 100 | 0.0123 / 0.0097            | 0.0096 / 0.0076 | 0.0044 / 0.0036 | 0.0122 / 0.0096 | 0.0097 / 0.0076 | 0.0044 / 0.0036 |
|     |     | 200 | 0.0057 / 0.0048            | 0.0046 / 0.0037 | 0.0022 / 0.0018 | 0.0058 / 0.0049 | 0.0047 / 0.0038 | 0.0023 / 0.0018 |
|     |     | 400 | 0.0027 / 0.0024            | 0.0023 / 0.0019 | 0.0011 / 0.0009 | 0.0027 / 0.0024 | 0.0022 / 0.0019 | 0.0011 / 0.0009 |
| 0.7 |     | 50  | 0.0520 / 0.0199            | 0.0428 / 0.0170 | 0.0225 / 0.0117 | 0.0522 / 0.0200 | 0.0429 / 0.0170 | 0.0223 / 0.0116 |
|     |     | 100 | 0.0243 / 0.0098            | 0.0205 / 0.0083 | 0.0111 / 0.0057 | 0.0242 / 0.0097 | 0.0207 / 0.0085 | 0.0111 / 0.0057 |
|     |     | 200 | 0.0119 / 0.0049            | 0.0101 / 0.0042 | 0.0055 / 0.0028 | 0.0118 / 0.0049 | 0.0102 / 0.0042 | 0.0055 / 0.0028 |
|     |     | 400 | 0.0058 / 0.0024            | 0.0050 / 0.0021 | 0.0027 / 0.0014 | 0.0059 / 0.0024 | 0.0050 / 0.0021 | 0.0028 / 0.0014 |
| 0.9 |     | 50  | 0.2870 / 0.0199            | 0.1663 / 0.0167 | 0.0785 / 0.0108 | 0.2111 / 0.0197 | 0.1652 / 0.0167 | 0.0787 / 0.0109 |
|     |     | 100 | 0.0997 / 0.0098            | 0.0780 / 0.0082 | 0.0385 / 0.0056 | 0.1006 / 0.0099 | 0.0789 / 0.0084 | 0.0386 / 0.0057 |
|     |     | 200 | 0.0467 / 0.0049            | 0.0365 / 0.0041 | 0.0181 / 0.0028 | 0.0461 / 0.0049 | 0.0370 / 0.0042 | 0.0184 / 0.0028 |

|     |     |     |                 |                 |                 |                 |                 |                 |
|-----|-----|-----|-----------------|-----------------|-----------------|-----------------|-----------------|-----------------|
|     |     | 400 | 0.0224 / 0.0024 | 0.0180 / 0.0021 | 0.0090 / 0.0014 | 0.0225 / 0.0024 | 0.0179 / 0.0021 | 0.0090 / 0.0014 |
| 0.7 | 0.7 | 50  | 0.0851 / 0.0187 | 0.0799 / 0.0149 | 0.0406 / 0.0096 | 0.0408 / 0.0221 | 0.0257 / 0.0186 | 0.0105 / 0.0090 |
|     |     | 100 | 0.0437 / 0.0093 | 0.0404 / 0.0074 | 0.0197 / 0.0047 | 0.0151 / 0.0109 | 0.0117 / 0.0091 | 0.0053 / 0.0044 |
|     |     | 200 | 0.0229 / 0.0046 | 0.0199 / 0.0037 | 0.0098 / 0.0023 | 0.0065 / 0.0054 | 0.0055 / 0.0045 | 0.0027 / 0.0022 |
|     |     | 400 | 0.0123 / 0.0023 | 0.0098 / 0.0018 | 0.0048 / 0.0012 | 0.0030 / 0.0026 | 0.0027 / 0.0022 | 0.0013 / 0.0011 |
| 0.9 |     | 50  | 0.2581 / 0.0180 | 0.2196 / 0.0133 | 0.1165 / 0.0075 | 0.2166 / 0.0239 | 0.1358 / 0.0239 | 0.0573 / 0.0178 |
|     |     | 100 | 0.1351 / 0.0089 | 0.1236 / 0.0066 | 0.0648 / 0.0038 | 0.0861 / 0.0120 | 0.0520 / 0.0120 | 0.0260 / 0.0091 |
|     |     | 200 | 0.0702 / 0.0044 | 0.0656 / 0.0033 | 0.0315 / 0.0019 | 0.0312 / 0.0059 | 0.0226 / 0.0059 | 0.0124 / 0.0045 |
|     |     | 400 | 0.0380 / 0.0022 | 0.0336 / 0.0016 | 0.0155 / 0.0009 | 0.0125 / 0.0029 | 0.0110 / 0.0029 | 0.0060 / 0.0022 |
| 0.9 | 0.9 | 50  | 0.3159 / 0.0170 | 0.2382 / 0.0115 | 0.1137 / 0.0054 | 0.3341 / 0.0417 | 0.1319 / 0.0451 | 0.0264 / 0.0226 |
|     |     | 100 | 0.2620 / 0.0084 | 0.2262 / 0.0057 | 0.1251 / 0.0027 | 0.1111 / 0.0206 | 0.0385 / 0.0225 | 0.0135 / 0.0116 |
|     |     | 200 | 0.1587 / 0.0042 | 0.1564 / 0.0029 | 0.0891 / 0.0014 | 0.0208 / 0.0102 | 0.0141 / 0.0109 | 0.0065 / 0.0055 |
|     |     | 400 | 0.0915 / 0.0021 | 0.0938 / 0.0014 | 0.0489 / 0.0007 | 0.0063 / 0.0050 | 0.0066 / 0.0053 | 0.0033 / 0.0027 |

<sup>a</sup>Results are averages of 50 replicate sampling distributions (1,000 haplotype samples each) of  $\hat{D}'$  and  $\hat{r}$ .

**Supplementary Table 2.** Biases ( $B$ ) of  $\hat{D}'$  and  $\hat{r}$  for different LD intensities ( $\pm W$ ,  $\pm M$  and  $\pm S$ ), combinations of allele frequencies ( $p$  and  $q$ ) at the loci and sample sizes ( $N$ )<sup>a</sup>

| $p$ | $q$ | $N$ | $B(\hat{D}') / B(\hat{r})$ |                   |                   |                   |                    |                    |
|-----|-----|-----|----------------------------|-------------------|-------------------|-------------------|--------------------|--------------------|
|     |     |     | $-W$                       | $-M$              | $-S$              | $+W$              | $+M$               | $+S$               |
| 0.5 | 0.5 | 50  | -0.0321 / -0.00008         | -0.0620 / -0.0002 | -0.0593 / +0.0001 | +0.0321 / +0.0002 | +0.0617 / -0.00004 | +0.0592 / +0.0004  |
|     |     | 100 | -0.0212 / +0.0005          | -0.0420 / +0.0003 | -0.0416 / -0.0001 | +0.0216 / -0.0002 | +0.0428 / +0.0003  | +0.0419 / +0.0004  |
|     |     | 200 | -0.0154 / -0.0004          | -0.0292 / +0.0003 | -0.0293 / -0.0001 | +0.0153 / +0.0001 | +0.0298 / +0.0002  | +0.0292 / +0.00005 |
|     |     | 400 | -0.0106 / -0.0001          | -0.0203 / +0.0002 | -0.0204 / +0.0002 | +0.0102 / -0.0003 | +0.0208 / +0.0002  | +0.0205 / +0.0001  |
| 0.7 |     | 50  | -0.0039 / -0.00005         | -0.0055 / +0.0003 | -0.0030 / +0.0008 | +0.0040 / +0.0001 | +0.0064 / +0.0001  | +0.0033 / -0.0015  |
|     |     | 100 | -0.0010 / +0.0004          | -0.0024 / +0.0005 | -0.0024 / +0.0004 | +0.0017 / -0.0001 | +0.0033 / +0.0006  | +0.0012 / -0.0008  |
|     |     | 200 | -0.0008 / +0.0001          | -0.0010 / +0.0004 | -0.0009 / +0.0003 | +0.0001 / -0.0006 | +0.0018 / -0.00002 | +0.0006 / -0.0004  |
|     |     | 400 | -0.0004 / +0.00005         | -0.0005 / +0.0002 | -0.0002 / +0.0001 | +0.0008 / +0.0002 | +0.0010 / +0.0003  | +0.00005 / -0.0004 |
| 0.9 |     | 50  | -0.0035 / -0.0004          | -0.0039 / +0.0005 | -0.0043 / +0.0003 | +0.0043 / +0.0007 | +0.0067 / +0.0008  | +0.0026 / -0.0001  |
|     |     | 100 | -0.0007 / +0.0008          | -0.0048 / +0.0011 | -0.0016 / +0.0026 | +0.0006 / -0.0009 | +0.0013 / -0.0018  | +0.0011 / -0.0027  |
|     |     | 200 | +0.00004 / +0.0005         | -0.0010 / +0.0008 | -0.0013 / +0.0012 | -0.0001 / -0.0005 | +0.0017 / -0.0007  | +0.0004 / -0.0016  |

|     |     |     |                   |                    |                   |                    |                   |                    |
|-----|-----|-----|-------------------|--------------------|-------------------|--------------------|-------------------|--------------------|
|     |     | 400 | -0.0006 / +0.0001 | -0.0013 / +0.0002  | -0.0003 / +0.0008 | +0.0003 / -0.0002  | +0.0013 / -0.0001 | +0.00005 / -0.0008 |
| 0.7 | 0.7 | 50  | -0.0347 / -0.0006 | -0.0074 / +0.0016  | -0.0032 / +0.0019 | +0.0261 / -0.0003  | +0.0678 / -0.0005 | +0.0648 / -0.0005  |
|     |     | 100 | -0.0167 / -0.0005 | -0.0019 / +0.0009  | -0.0018 / +0.0009 | +0.0218 / -0.0007  | +0.0455 / -0.0008 | +0.0456 / +0.00001 |
|     |     | 200 | -0.0064 / -0.0003 | -0.0017 / +0.0002  | -0.0013 / +0.0003 | +0.0160 / -0.0003  | +0.0323 / -0.0001 | +0.0317 / -0.0003  |
|     |     | 400 | -0.0013 / +0.0001 | -0.0008 / +0.00004 | -0.0008 / +0.0001 | +0.0114 / -0.0002  | +0.0222 / -0.0002 | +0.0222 / -0.0002  |
| 0.9 |     | 50  | -0.1132 / +0.0032 | -0.0524 / -0.0001  | -0.0104 / +0.0015 | -0.0703 / +0.0039  | -0.0109 / +0.0005 | +0.0016 / +0.0004  |
|     |     | 100 | -0.0619 / +0.0001 | -0.0164 / +0.0001  | -0.0031 / +0.0018 | -0.0295 / -0.0006  | +0.0014 / -0.0017 | +0.0022 / -0.0030  |
|     |     | 200 | -0.0302 / +0.0003 | -0.0040 / +0.0006  | -0.0015 / +0.0006 | -0.0082 / -0.0003  | +0.0026 / -0.0004 | +0.0002 / -0.0021  |
|     |     | 400 | -0.0115 / +0.0006 | -0.0013 / +0.0003  | -0.0004 / +0.0004 | -0.0006 / +0.00002 | +0.0005 / -0.0006 | +0.0006 / -0.0006  |
| 0.9 | 0.9 | 50  | -0.3968 / -0.0002 | -0.2327 / +0.0004  | -0.0883 / +0.0004 | -0.1319 / -0.0004  | +0.0736 / -0.0001 | +0.0958 / +0.0017  |
|     |     | 100 | -0.2524 / +0.0005 | -0.1283 / +0.0009  | -0.0037 / +0.0019 | -0.0188 / -0.0030  | +0.0666 / -0.0052 | +0.0684 / -0.0032  |
|     |     | 200 | -0.1416 / +0.0006 | -0.0515 / +0.0005  | -0.0092 / +0.0007 | +0.0177 / -0.0019  | +0.0477 / -0.0030 | +0.0484 / -0.0015  |
|     |     | 400 | -0.0823 / -0.0001 | -0.0163 / +0.0003  | -0.0002 / +0.0005 | +0.0174 / -0.0004  | +0.0339 / -0.0011 | +0.0338 / -0.0011  |

<sup>a</sup> Results are averages of 50 replicate sampling distributions (1,000 haplotype samples each) of  $\hat{D}'$  and  $\hat{r}$ .

**Supplementary Table 3.** Variation coefficients ( $CV$ ) of  $\hat{D}'$  and  $\hat{r}$  for different LD intensities ( $\pm W$ ,  $\pm M$  and  $\pm S$ ), combinations of allele frequencies ( $p$  and  $q$ ) at the loci, and sample sizes ( $N$ )<sup>a</sup>

| $p$ | $q$ | $N$ | $CV(\hat{D}') / CV(\hat{r})$ |         |         |           |         |         |
|-----|-----|-----|------------------------------|---------|---------|-----------|---------|---------|
|     |     |     | $-W$                         | $-M$    | $-S$    | $+W$      | $+M$    | $+S$    |
| 0.5 | 0.5 | 50  | 71 / 70                      | 25 / 25 | 11 / 11 | 69 / 69   | 26 / 25 | 11 / 11 |
|     |     | 100 | 50 / 49                      | 18 / 17 | 8 / 7   | 50 / 49   | 18 / 17 | 8 / 7   |
|     |     | 200 | 35 / 35                      | 13 / 12 | 6 / 5   | 35 / 35   | 13 / 12 | 6 / 5   |
|     |     | 400 | 25 / 25                      | 9 / 9   | 4 / 7   | 25 / 25   | 9 / 9   | 4 / 7   |
| 0.7 |     | 50  | 112 / 108                    | 41 / 40 | 19 / 21 | 108 / 108 | 41 / 40 | 19 / 21 |
|     |     | 100 | 78 / 76                      | 29 / 28 | 13 / 14 | 77 / 75   | 29 / 28 | 13 / 14 |
|     |     | 200 | 54 / 53                      | 20 / 20 | 9 / 10  | 54 / 54   | 20 / 20 | 9 / 10  |
|     |     | 400 | 38 / 38                      | 14 / 14 | 7 / 7   | 38 / 38   | 14 / 14 | 7 / 7   |
| 0.9 |     | 50  | 228 / 211                    | 81 / 78 | 35 / 39 | 225 / 209 | 80 / 77 | 35 / 39 |
|     |     | 100 | 158 / 150                    | 55 / 55 | 24 / 28 | 158 / 151 | 56 / 56 | 25 / 28 |
|     |     | 200 | 108 / 106                    | 38 / 39 | 17 / 20 | 107 / 106 | 38 / 39 | 17 / 20 |
|     |     | 400 | 75 / 74                      | 27 / 27 | 12 / 14 | 75 / 74   | 27 / 27 | 12 / 14 |

|     |     |     |           |          |         |           |         |         |
|-----|-----|-----|-----------|----------|---------|-----------|---------|---------|
| 0.7 | 0.7 | 50  | 124 / 159 | 56 / 57  | 25 / 29 | 89 / 74   | 28 / 27 | 12 / 12 |
|     |     | 100 | 97 / 112  | 40 / 40  | 17 / 20 | 55 / 52   | 20 / 19 | 9 / 8   |
|     |     | 200 | 73 / 79   | 28 / 28  | 12 / 14 | 37 / 37   | 14 / 13 | 6 / 6   |
|     |     | 400 | 55 / 56   | 20 / 20  | 9 / 10  | 26 / 26   | 10 / 9  | 4 / 4   |
| 0.9 |     | 50  | 163 / 311 | 85 / 106 | 42 / 50 | 355 / 151 | 75 / 61 | 30 / 33 |
|     |     | 100 | 140 / 218 | 68 / 75  | 32 / 36 | 173 / 108 | 45 / 43 | 20 / 24 |
|     |     | 200 | 115 / 153 | 51 / 53  | 22 / 25 | 92 / 76   | 30 / 30 | 14 / 17 |
|     |     | 400 | 92 / 109  | 37 / 37  | 16 / 18 | 56 / 53   | 21 / 21 | 10 / 12 |
| 0.9 | 0.9 | 50  | 94 / 595  | 67 / 196 | 38 / 83 | 938 / 102 | 63 / 43 | 18 / 19 |
|     |     | 100 | 113 / 427 | 76 / 139 | 42 / 60 | 185 / 73  | 35 / 30 | 13 / 14 |
|     |     | 200 | 117 / 303 | 72 / 98  | 37 / 42 | 66 / 51   | 22 / 21 | 9 / 9   |
|     |     | 400 | 107 / 207 | 59 / 68  | 28 / 30 | 37 / 35   | 15 / 15 | 7 / 7   |

---

<sup>a</sup>Results are averages of 50 replicate sampling distributions (1,000 haplotype samples each) of  $\hat{D}'$  and  $\hat{r}$ .

---

**Supplementary Table 4.** Standardised biases ( $SB$ ) of  $\hat{D}'$  and  $\hat{r}$  for different LD intensities ( $\pm W$ ,  $\pm M$  and  $\pm S$ ), combinations of allele frequencies ( $p$  and  $q$ ) at the loci, and sample sizes ( $N$ )<sup>a</sup>

| $p$ | $q$ | $N$ | $SB(\hat{D}') / SB(\hat{r})$ |               |               |             |               |               |
|-----|-----|-----|------------------------------|---------------|---------------|-------------|---------------|---------------|
|     |     |     | $-W$                         | $-M$          | $-S$          | $+W$        | $+M$          | $+S$          |
| 0.5 | 0.5 | 50  | -6.1 / -3.0                  | -16.6 / -9.0  | -36.6 / -23.7 | +6.1 / +3.0 | +16.6 / +9.0  | +37.0 / +24.0 |
|     |     | 100 | -4.2 / -2.0                  | -11.4 / -5.7  | -25.9 / -14.5 | +4.2 / +2.0 | +11.4 / +5.7  | +25.8 / +14.4 |
|     |     | 200 | -2.9 / -1.3                  | -7.9 / -3.8   | -18.2 / -9.3  | +2.8 / +1.3 | +7.8 / +3.7   | +18.3 / +9.3  |
|     |     | 400 | -2.0 / -0.9                  | -5.5 / -2.6   | -12.8 / -6.1  | +2.0 / +0.9 | +5.4 / +2.5   | +12.9 / +6.2  |
| 0.7 |     | 50  | -3.9 / -3.5                  | -11.7 / -10.6 | -28.1 / -25.6 | +4.1 / +3.7 | +11.6 / +10.4 | +28.0 / +25.5 |
|     |     | 100 | -2.8 / -2.5                  | -7.9 / -7.1   | -19.3 / -17.5 | +2.7 / +2.5 | +8.0 / +7.2   | +19.2 / +17.6 |
|     |     | 200 | -1.8 / -1.7                  | -5.5 / -5.1   | -13.4 / -12.4 | +1.9 / +1.8 | +5.5 / +5.0   | +13.2 / +12.3 |
|     |     | 400 | -1.3 / -1.3                  | -3.8 / -3.6   | -9.4 / -9.0   | +1.3 / +1.2 | +3.9 / +3.6   | +9.4 / +9.0   |
| 0.9 |     | 50  | -7.8 / -7.7                  | -22.5 / -23.3 | -53.2 / -38.9 | +8.0 / +7.9 | +22.3 / +23.2 | +52.5 / +38.4 |
|     |     | 100 | -5.2 / -4.8                  | -15.3 / -14.3 | -35.1 / -30.8 | +5.4 / +4.9 | +15.4 / +14.4 | +35.2 / +31.2 |
|     |     | 200 | -3.7 / -3.4                  | -10.3 / -9.5  | -24.2 / -22.5 | +3.8 / +3.5 | +10.2 / +9.4  | +24.3 / +22.8 |
|     |     | 400 | -2.6 / -2.4                  | -7.2 / -6.8   | -16.8 / -16.0 | +2.5 / +2.3 | +7.2 / +6.8   | +16.9 / +16.1 |

|     |     |     |               |               |               |              |               |               |
|-----|-----|-----|---------------|---------------|---------------|--------------|---------------|---------------|
| 0.7 | 0.7 | 50  | -8.4 / -10.6  | -16.4 / -18.5 | -37.0 / -35.0 | +5.8 / -0.9  | +18.1 / +7.9  | +40.2 / +27.0 |
|     |     | 100 | -5.1 / -7.4   | -11.2 / -12.6 | -25.6 / -25.1 | +4.3 / -0.9  | +12.6 / +5.1  | +28.1 / +15.7 |
|     |     | 200 | -3.0 / -5.1   | -7.7 / -8.9   | -17.8 / -17.8 | +3.0 / -0.7  | +8.5 / +3.1   | +19.8 / +10.0 |
|     |     | 400 | -2.0 / -3.7   | -5.3 / -6.2   | -12.3 / -12.7 | +2.1 / -0.6  | +6.0 / +2.1   | +13.9 / +6.5  |
| 0.9 |     | 50  | -20.5 / -23.9 | -34.8 / -40.0 | -66.0 / -49.0 | -1.0 / -5.1  | +16.3 / +12.2 | +43.7 / +32.0 |
|     |     | 100 | -12.8 / -15.6 | -22.2 / -26.0 | -49.3 / -43.2 | +1.3 / -3.6  | +11.7 / +6.8  | +29.3 / +23.8 |
|     |     | 200 | -7.8 / -10.6  | -14.3 / -16.9 | -31.6 / -32.6 | +1.8 / -2.5  | +8.0 / +4.6   | +20.0 / +16.9 |
|     |     | 400 | -5.0 / -7.6   | -10.0 / -11.9 | -22.6 / -22.9 | +1.7 / -1.6  | +5.8 / +3.5   | +13.9 / +12.2 |
| 0.9 | 0.9 | 50  | -54.7 / -58.6 | -67.0 / -69.5 | -84.9 / -59.7 | -4.8 / -13.3 | +26.9 / +12.9 | +63.1 / +45.8 |
|     |     | 100 | -36.6 / -42.3 | -49.0 / -56.5 | -75.1 / -59.1 | +2.2 / -10.9 | +19.4 / +5.3  | +44.0 / +29.2 |
|     |     | 200 | -22.2 / -27.5 | -30.2 / -38.8 | -60.5 / -57.1 | +4.0 / -7.8  | +13.3 / +2.7  | +30.6 / +16.8 |
|     |     | 400 | -13.5 / -18.7 | -19.4 / -25.7 | -40.0 / -44.4 | +3.1 / -5.4  | +9.1 / +1.6   | +21.3 / +10.2 |

<sup>a</sup> Results are averages of 50 replicate sampling distributions (1,000 haplotype samples each) of  $\hat{D}'$  and  $\hat{r}$ .



**Supplementary Table 5.** Mean square errors ( $MSE$ ) of  $\hat{D}'$  and  $\hat{r}$  for different LD intensities ( $\pm W$ ,  $\pm M$  and  $\pm S$ ), combinations of allele frequencies ( $p$  and  $q$ ) at the loci, and sample sizes ( $N$ )<sup>a</sup>

| $p$ | $q$ | $N$ | $MSE(\hat{D}') / MSE(\hat{r})$ |                 |                 |                 |                 |                 |
|-----|-----|-----|--------------------------------|-----------------|-----------------|-----------------|-----------------|-----------------|
|     |     |     | $-W$                           | $-M$            | $-S$            | $+W$            | $+M$            | $+S$            |
| 0.5 | 0.5 | 50  | 0.0286 / 0.0196                | 0.0244 / 0.0152 | 0.0123 / 0.0073 | 0.0280 / 0.0193 | 0.0247 / 0.0154 | 0.0121 / 0.0073 |
|     |     | 100 | 0.0127 / 0.0097                | 0.0114 / 0.0076 | 0.0061 / 0.0036 | 0.0127 / 0.0096 | 0.0115 / 0.0076 | 0.0062 / 0.0036 |
|     |     | 200 | 0.0059 / 0.0048                | 0.0055 / 0.0037 | 0.0031 / 0.0018 | 0.0060 / 0.0049 | 0.0056 / 0.0038 | 0.0032 / 0.0018 |
|     |     | 400 | 0.0028 / 0.0024                | 0.0027 / 0.0019 | 0.0015 / 0.0009 | 0.0028 / 0.0024 | 0.0026 / 0.0019 | 0.0015 / 0.0009 |
| 0.7 |     | 50  | 0.0520 / 0.0199                | 0.0428 / 0.0170 | 0.0225 / 0.0117 | 0.0522 / 0.0200 | 0.0429 / 0.0170 | 0.0223 / 0.0116 |
|     |     | 100 | 0.0243 / 0.0098                | 0.0205 / 0.0083 | 0.0111 / 0.0057 | 0.0242 / 0.0097 | 0.0207 / 0.0085 | 0.0111 / 0.0057 |
|     |     | 200 | 0.0119 / 0.0049                | 0.0101 / 0.0042 | 0.0055 / 0.0028 | 0.0118 / 0.0049 | 0.0102 / 0.0042 | 0.0055 / 0.0028 |
|     |     | 400 | 0.0058 / 0.0024                | 0.0050 / 0.0021 | 0.0027 / 0.0014 | 0.0059 / 0.0024 | 0.0050 / 0.0021 | 0.0028 / 0.0014 |
| 0.9 |     | 50  | 0.2870 / 0.0240                | 0.1663 / 0.0167 | 0.0785 / 0.0108 | 0.2250 / 0.0197 | 0.1652 / 0.0167 | 0.0787 / 0.0109 |
|     |     | 100 | 0.0997 / 0.0098                | 0.0780 / 0.0082 | 0.0385 / 0.0056 | 0.1006 / 0.0099 | 0.0789 / 0.0084 | 0.0386 / 0.0057 |
|     |     | 200 | 0.0467 / 0.0049                | 0.0365 / 0.0041 | 0.0181 / 0.0028 | 0.0461 / 0.0049 | 0.0370 / 0.0042 | 0.0184 / 0.0028 |

|     |     |     |                 |                 |                 |                 |                 |                 |
|-----|-----|-----|-----------------|-----------------|-----------------|-----------------|-----------------|-----------------|
|     |     | 400 | 0.0224 / 0.0024 | 0.0180 / 0.0021 | 0.0090 / 0.0014 | 0.0225 / 0.0024 | 0.0179 / 0.0021 | 0.0090 / 0.0014 |
| 0.7 | 0.7 | 50  | 0.0863 / 0.0187 | 0.0800 / 0.0149 | 0.0406 / 0.0096 | 0.0415 / 0.0221 | 0.0303 / 0.0186 | 0.0147 / 0.0090 |
|     |     | 100 | 0.0439 / 0.0093 | 0.0404 / 0.0074 | 0.0197 / 0.0047 | 0.0156 / 0.0109 | 0.0138 / 0.0091 | 0.0074 / 0.0044 |
|     |     | 200 | 0.0229 / 0.0046 | 0.0199 / 0.0037 | 0.0098 / 0.0023 | 0.0068 / 0.0054 | 0.0065 / 0.0045 | 0.0037 / 0.0022 |
|     |     | 400 | 0.0123 / 0.0023 | 0.0098 / 0.0018 | 0.0048 / 0.0012 | 0.0031 / 0.0026 | 0.0032 / 0.0022 | 0.0018 / 0.0011 |
| 0.9 |     | 50  | 0.2709 / 0.0180 | 0.2223 / 0.0133 | 0.1166 / 0.0075 | 0.2215 / 0.0239 | 0.1359 / 0.0239 | 0.0573 / 0.0178 |
|     |     | 100 | 0.1389 / 0.0089 | 0.1239 / 0.0066 | 0.0648 / 0.0038 | 0.0870 / 0.0120 | 0.0520 / 0.0120 | 0.0260 / 0.0091 |
|     |     | 200 | 0.0711 / 0.0044 | 0.0656 / 0.0033 | 0.0315 / 0.0019 | 0.0313 / 0.0059 | 0.0226 / 0.0059 | 0.0124 / 0.0045 |
|     |     | 400 | 0.0381 / 0.0022 | 0.0336 / 0.0016 | 0.0155 / 0.0009 | 0.0125 / 0.0029 | 0.0110 / 0.0029 | 0.0060 / 0.0022 |
| 0.9 | 0.9 | 50  | 0.4734 / 0.0170 | 0.2923 / 0.0115 | 0.1215 / 0.0054 | 0.3515 / 0.0417 | 0.1373 / 0.0451 | 0.0356 / 0.0226 |
|     |     | 100 | 0.3257 / 0.0084 | 0.2427 / 0.0057 | 0.1251 / 0.0027 | 0.1115 / 0.0206 | 0.0429 / 0.0225 | 0.0182 / 0.0116 |
|     |     | 200 | 0.1788 / 0.0042 | 0.1591 / 0.0029 | 0.0892 / 0.0014 | 0.0211 / 0.0102 | 0.0164 / 0.0109 | 0.0088 / 0.0055 |
|     |     | 400 | 0.0983 / 0.0021 | 0.0941 / 0.0014 | 0.0489 / 0.0007 | 0.0066 / 0.0050 | 0.0077 / 0.0053 | 0.0044 / 0.0027 |

<sup>a</sup> Results are averages of 50 replicate sampling distributions (1,000 haplotype samples each) of  $\hat{D}'$  and  $\hat{r}$ .

**Supplementary Table 6.** Mean relative errors (*RelError*) of  $\hat{D}'$  and  $\hat{r}$  for different LD intensities ( $\pm W$ ,  $\pm M$  and  $\pm S$ ), combinations of allele frequencies ( $p$  and  $q$ ) at the loci, and sample sizes ( $N$ )<sup>a</sup>

| $p$ | $q$ | $N$ | $RelError(\hat{D}') / RelError(\hat{r})$ |         |         |           |         |         |
|-----|-----|-----|------------------------------------------|---------|---------|-----------|---------|---------|
|     |     |     | $-W$                                     | $-M$    | $-S$    | $+W$      | $+M$    | $+S$    |
| 0.5 | 0.5 | 50  | 85 / 70                                  | 31 / 25 | 14 / 11 | 84 / 69   | 31 / 25 | 14 / 11 |
|     |     | 100 | 56 / 49                                  | 21 / 17 | 10 / 8  | 56 / 49   | 21 / 17 | 10 / 8  |
|     |     | 200 | 39 / 35                                  | 15 / 12 | 7 / 5   | 39 / 35   | 15 / 12 | 7 / 5   |
|     |     | 400 | 27 / 24                                  | 10 / 9  | 5 / 4   | 26 / 24   | 10 / 9  | 5 / 4   |
| 0.7 |     | 50  | 114 / 108                                | 41 / 40 | 19 / 21 | 114 / 108 | 41 / 40 | 19 / 21 |
|     |     | 100 | 78 / 76                                  | 29 / 28 | 13 / 14 | 78 / 75   | 29 / 28 | 13 / 14 |
|     |     | 200 | 55 / 53                                  | 20 / 20 | 9 / 10  | 54 / 53   | 20 / 20 | 9 / 10  |
|     |     | 400 | 38 / 37                                  | 14 / 14 | 6 / 7   | 38 / 37   | 14 / 14 | 7 / 7   |
| 0.9 |     | 50  | 268 / 231                                | 82 / 77 | 35 / 39 | 237 / 209 | 81 / 77 | 35 / 39 |
|     |     | 100 | 158 / 148                                | 56 / 54 | 24 / 28 | 159 / 149 | 56 / 55 | 25 / 28 |

|     |     |     |           |           |         |           |         |         |
|-----|-----|-----|-----------|-----------|---------|-----------|---------|---------|
|     |     | 200 | 108 / 104 | 38 / 38   | 17 / 20 | 107 / 104 | 38 / 39 | 17 / 20 |
|     |     | 400 | 75 / 73   | 27 / 27   | 12 / 14 | 75 / 73   | 27 / 27 | 12 / 14 |
| 0.7 | 0.7 | 50  | 147 / 159 | 56 / 57   | 25 / 29 | 101 / 74  | 35 / 27 | 15 / 12 |
|     |     | 100 | 105 / 112 | 40 / 40   | 18 / 20 | 62 / 52   | 23 / 19 | 11 / 8  |
|     |     | 200 | 76 / 79   | 28 / 28   | 12 / 14 | 41 / 37   | 16 / 13 | 8 / 6   |
|     |     | 400 | 55 / 56   | 20 / 20   | 9 / 10  | 28 / 25   | 11 / 9  | 5 / 4   |
| 0.9 |     | 50  | 260 / 305 | 94 / 106  | 43 / 50 | 235 / 152 | 74 / 61 | 30 / 33 |
|     |     | 100 | 186 / 214 | 70 / 75   | 32 / 35 | 147 / 107 | 46 / 43 | 20 / 23 |
|     |     | 200 | 133 / 151 | 51 / 53   | 22 / 25 | 88 / 75   | 30 / 30 | 14 / 16 |
|     |     | 400 | 98 / 107  | 37 / 37   | 16 / 17 | 56 / 53   | 21 / 21 | 10 / 12 |
| 0.9 | 0.9 | 50  | 344 / 593 | 108 / 191 | 44 / 83 | 296 / 102 | 74 / 42 | 24 / 19 |
|     |     | 100 | 285 / 417 | 99 / 135  | 44 / 58 | 167 / 72  | 41 / 30 | 17 / 13 |
|     |     | 200 | 211 / 295 | 80 / 96   | 37 / 42 | 73 / 51   | 26 / 21 | 12 / 9  |
|     |     | 400 | 156 / 208 | 61 / 67   | 28 / 30 | 41 / 35   | 18 / 15 | 8 / 6   |

---

<sup>a</sup>Results are averages of 50 replicate sampling distributions (1,000 haplotype samples each) of  $\hat{D}'$  and  $\hat{r}$ .

---
