# Supplementary material
Source: publisher figshare collection journal article supplement (https://karger.figshare.com/articles/dataset/_/5122435)
Supplement: Supplementary file 2 [file 1]

Archive with 3 entries (3 files):
- 000327732_sm_Example.pdf
- 000327732_sm_Simulation details.pdf
- 000327732_sm_Tables.pdf
