# Supplementary material
Source: publisher figshare collection journal article supplement (https://karger.figshare.com/articles/dataset/_/5122435)
Supplement: Supplementary file 2 [file 1 › 000327732_sm_Example.pdf]

*Example of the advantages of  $D'$  over  $r$  as a general measure of the strength of LD*

Values of  $\hat{D}'$  and  $\hat{r}$  for nine pairs of SNPs on the short arm of human chromosome 11 from a sample on 45 Japanese individuals in Tokyo, Japan (JPT), are shown in suppl. table 7. It can be seen that  $\hat{D}'$  and  $\hat{r}$  provide a different perspective on the amount of LD between SNPs and its relationship with physical distance along this region of human chromosome 11. Thus,  $\hat{D}'$ -values are always higher than those of  $\hat{r}$  and their mean values ( $\pm$ SE) over pairs of SNPs are  $0.58 \pm 0.10$  and  $0.25 \pm 0.07$ , respectively, which is consistent with most previous studies describing patterns of LD in populations [9-14]. This research shows that the relative efficiency of the two LD measures is very similar when their differences in range are considered. Therefore, the estimates of  $D'$  and  $r$  are apparently different because both LD measures also operate on different scales. For example, values of  $\hat{D}'$  and  $\hat{r}$  for the SNP pair rs3813727 and rs3813726 (top of suppl. table 7) seem to be very different (+1.0 and +0.16, respectively) but they are the maximum possible values of their respective ranges of positive sign. Overall,  $D'$  has the advantage of providing a more direct and reliable information on the strength of LD than  $r$  because it always ranges from -1.0 to +1.0. On the other hand, estimates of  $D'$  (in absolute values) reveal a strong negative relationship of the strength of LD between pairs of SNPs with physical distance ( $r_s = -0.90$ ,  $P = 0.001$ , one-sided test), a consistent pattern with the prediction of higher LD when there is lower physical distance. In contrast,  $\hat{r}$ -values for pairs of SNPs are not significantly correlated with physical distance ( $r_s = -0.12$ ,  $P = 0.38$ , one-sided test). This example illustrates the advantage of  $D'$  over  $r$  to identify gradients of LD along chromosomes, which is very useful for gene mapping of quantitative characters and human diseases (see [1, 2] and references therein).

**Supplementary Table 7.** LD between SNPs located on the short arm of human chromosome 11 in a sample of Japanese individuals<sup>a</sup>

| Pair of SNPs           | Distance<br>(kb) | $\hat{p}$ | $\hat{q}$ | $\hat{D}'$ | $\hat{r}$ | Range of $\hat{r}$<br>(min, max) <sup>b</sup> |
|------------------------|------------------|-----------|-----------|------------|-----------|-----------------------------------------------|
| rs3813727 x rs3813726  | 0.08             | 0.69      | 0.99      | +1.0       | +0.16     | -0.07, +0.16                                  |
| rs3813726 x rs7948416  | 0.44             | 0.99      | 0.86      | -1.0       | -0.05     | -0.05, +0.26                                  |
| rs7927539 x rs6578561  | 0.45             | 0.91      | 0.93      | +0.81      | +0.69     | -0.09, +0.86                                  |
| rs4320977 x rs11036405 | 0.84             | 0.71      | 0.92      | -0.76      | -0.15     | -0.19, +0.46                                  |
| rs6578565 x rs6578568  | 2.51             | 0.91      | 0.78      | +0.63      | +0.37     | -0.17, +0.59                                  |
| rs3752382 x rs3759074  | 3.84             | 0.97      | 0.86      | +0.54      | +0.25     | -0.08, +0.45                                  |
| rs2187610 x rs7936823  | 4.76             | 0.80      | 0.64      | +0.48      | +0.34     | -0.37, +0.66                                  |
| rs7927539 x rs7934373  | 7.09             | 0.91      | 0.73      | +0.20      | +0.11     | -0.19, +0.51                                  |
| rs7934373 x rs11036227 | 17.73            | 0.73      | 0.68      | +0.13      | +0.12     | -0.42, +0.89                                  |

<sup>a</sup> Source of data: HapMap Project database (<http://hapmap.ncbi.nlm.nih.gov/>; HapMap Genome Browser release#24; Phase 1 & 2 – full dataset); <sup>b</sup> min and max are the minimum and maximum values of the range of  $\hat{r}$ , respectively, which were computed as described in ‘Methods’ section.
